# Supplementary material for: PTH1R Mutants Found in Patients with Primary Failure of Tooth Eruption Disrupt G-Protein Signaling
Source: PLOS journal article supplement (doi:10.1371/journal.pone.0167033), 2016-11-29
Supplement: S2 (10.1371/journal.pone.0167033.s002) [file journal.pone.0167033.s002]

<?xml version="1.0" encoding="UTF-8"?><GraphPadPrismFile PrismXMLVersion="5.00">
<Created>
<OriginalVersion CreatedByProgram="GraphPad Prism" CreatedByVersion="6.0d.232" RegisteredTo="      " Login="ewischm" DateTime="2016-09-01T13:57:40+02:00"></OriginalVersion>
<MostRecentVersion CreatedByProgram="GraphPad Prism" CreatedByVersion="6.0d.232" RegisteredTo="      " Login="ewischm" DateTime="2016-09-06T14:08:45+02:00"></MostRecentVersion>
</Created>
<InfoSequence>
<Ref ID="Info0" Selected="1"></Ref>
</InfoSequence>
<Info ID="Info0">
<Title>Project info 1</Title>
<Notes>
</Notes>
<Constant><Name>Experiment Date</Name><Value>2016-09-01</Value></Constant>
<Constant><Name>Experiment ID</Name><Value></Value></Constant>
<Constant><Name>Notebook ID</Name><Value></Value></Constant>
<Constant><Name>Project</Name><Value></Value></Constant>
<Constant><Name>Experimenter</Name><Value></Value></Constant>
<Constant><Name>Protocol</Name><Value></Value></Constant>
</Info>

<TableSequence>

<Ref ID="Table0" Selected="1"></Ref>
</TableSequence>
<Table ID="Table0" XFormat="none" YFormat="SEN" TableType="TwoWay" EVFormat="AsteriskAfterNumber">
<Title>Data 1</Title>
<RowTitlesColumn Width="82">
<Subcolumn>
<d>-PTH</d>
<d>+PTH</d>
</Subcolumn>
</RowTitlesColumn>
<YColumn Width="236" Decimals="3" Subcolumns="3">
<Title>WT</Title>
<Subcolumn>
<d>2,513</d>
<d>6,585</d>
</Subcolumn>
<Subcolumn>
<d>0,46</d>
<d>1,6</d>
</Subcolumn>
<Subcolumn>
<d>17</d>
<d>17</d>
</Subcolumn>
</YColumn>
<YColumn Width="236" Decimals="4" Subcolumns="3">
<Title>G452E</Title>
<Subcolumn>
<d>2,226</d>
<d>1,923</d>
</Subcolumn>
<Subcolumn>
<d>0,6225</d>
<d>0,5038</d>
</Subcolumn>
<Subcolumn>
<d>14</d>
<d>14</d>
</Subcolumn>
</YColumn>
<YColumn Width="236" Decimals="4" Subcolumns="3">
<Title>G339*</Title>
<Subcolumn>
<d>1,923</d>
<d>2,193</d>
</Subcolumn>
<Subcolumn>
<d>0,5038</d>
<d>0,5515</d>
</Subcolumn>
<Subcolumn>
<d>13</d>
<d>13</d>
</Subcolumn>
</YColumn>
</Table>

<!--Analyses, graphs and layouts as compressed binary. Don&apos;t edit this part of the file.-->

<Template dt:dt="bin.base64" xmlns:dt="urn:schemas-microsoft-com:datatypes">eNrsXQt4XMV1nr37fkmyMZR+NnwXFROw0WpXD0uiB3tlZCF9GKPaMuCmDV5La7N4
tbvsrvygJN4khBiSOJCQhCSEmkLSBELi5kFSkqZK0yaUkiYF3LRNm1LSFCeFkBba
hNLizsyd+zi7d1e7krClZY59d+e/d2bumZkzc2f+M7o7dtnw8OVbB3scpRAh5A7H
HQ6FHpPkWuU+cj4987KDILlW0b6d9DhBD4VeV0pjbyJkE0Us8m56uG1SnqRCRBxF
fBPLtxQpUqRIkSJl6Yt8rkuRIkWKFClSpEiRIkWKFClSpEiRIkWKFClSpEiRIkWK
FClsh91G+nmJk5A7Xeb32fTcWnH0k0psCttv9xhxEG+rj+Pb3CQwRjwcfUIZc1/l
e4X4Wl0itlvz17vIUyvrU+8e0rfynM9rbv6PBbt9k+xWZITjEbJw7v8ACZWdWdkH
Gw5MpdV9yXwhlc1c2h6LRNvVZGYiO5nK7Lm0ffv4cEd/+4b1AThv6KrLxneMbVJz
6VShqI5t37h59DK1vaOzczCXSyc7O4fGh9SxzaPbxlWaR2fnpi3tavv1xWLuks7O
/fv3RxIsVmQiO8UiFjrH8tlcMl88uJlm1kETRCaLk+30NlruSB16djI1UVwf8MPe
5MH1NAuRWS6fyhQjY4k9yeFsfipRjGhfRar5GLuUzEMnS0ETigzscyimJvYmi5GJ
fDJRzBpp/FAo0st7LNFvyO7S4kKnuDZLlqlicmown08cNDNNMMhCplL+uRfMb6q5
OXlgKpHfe92mrnXRyYxVw9o6FoqJYnI4ndhjzZPdZE8yvz4KnXqQq9xpVGSnXhDj
3GyFGLtyJJtP3ZTNFBPprclCs7RNlWKxlFTp9Pq+LujkgcXUElflU0mqcJF2suZp
B5tCWWswhmtwsTTFtolEmlZT8zRDWYGMjhBbhP3gavoMSk002XhkU6jFPRrpCjdd
V6hSsMXWJQrTu8a1++QSdFZ2XSqzO3udXmd2bTF25djY0BiLe1l2MrklMZU0q8qo
n0Zard5ma7DdrA1nbblZS2HRaLAHz6UabqeqDWVpKUtTWdvP0HI8n8gU0vzRto3r
wtVe0hVfR5EWVSuMp7J7Eku82quUwaJPqpDtSJzmuq45pA5O3jBdKCYn2cmtyYni
UmyIuRWwLNcatVz7En/i9Mf6rc8e/XRv3wA6bWmkRWsH1Jqb3BDKS1hpCbzJOmJd
dm3aEYvane7vtj3d29+7mC2AVsUonZ3Q6lnSQ3FjBVv047Op/PZMoikH6LpKKEfo
KvXUVEN0fUWUY3Qkl5ts3nG6WuEW0Zqlyp0Gx0av1vwrFaRJNBrpitZLkxQP5pI1
aJeyChsvb6jalERVXaupWq+m1RXVp17lmuqKQid3Tq0PeErsnRsK8XKvoiaD+VQi
XdOriOXrihnW8nHwo9F87rD4Bj3xtxKX8Fa+jYeepInuIj6LF1NDDoQUhJwI6fm9
h4dOnCTkQ+Rpr5nf3LWVIkWKFClSpJxuYQ/mjxN9B9O3yT5FmwlIkXJqRYkPlLTJ
sZ+cST+79icOqoNbrrp6UM3uVocSxYQaIwGyyuaVePpklchJKLmEtNHPEDnJO/er
oma+yutEsYnPdgb+prE4YALkYr5n0FwuzCaXki6+ZLBWsGJpH2dZW+lylBwWMV02
ux3L76KUtWb5decs6V2zXP+ZUW59YFTEsshFtNcxeviijfDa8tNjA1klYhkvY3St
QCWN89YYT+yaTifyaj5ZmE4XC5Z0hvjM2lZ4Op6bfUSl3ojOeiO66o3orjeip96I
3noj+uqN6K+MOEyG3Nr1VS1ypJUipVnEWWVO6yjDpM5HmfYgYlOJlx0vO1x8eHHa
pKQXZrpfefHyxfqtD4ouSx1QtQ+xMHurMDtclke106yfQ7WO3yFsAL0sm56eyqjD
iYliNk9+lwTpua3Z/fqJjxpZf4Y/U63zs2qLENJQCqXhFM6GU0itpFZSK6mV1Epq
JbWSWkmtpFZvFK0GBBnraIyMJTa3eSN7E0wyllXU/MhYpW4y9gJe6/WQsUfJ9Zb1
X2MEbOX12QhYSbBKglWKFCmSYJUEqyRYpVZSK6mV1EpqJbWSWkmtpFZSqzcOweoz
drsyhqYmpcpYF0mpahIkUUUPaYTpeaJGPiyO58uOL8ljUR1Dguh90tbOCblQ9Ef1
Pq9h6a9R6z/L6SCKS+HnFHHuC/TcvS4FdTGHjUPiCP8hdiZbRSynsBxiwSzH57gO
1wtdNZRC6AaE9iKURmgKoQxCWYRyCN2IUB6hAkJFhKYR2ofQfoQOIHQQoZsQ+j2E
bkborQi9DaFDCJUQejtC70DonQjdgtC7ELoVoXcjdBih2xC6HaH3IPRehN6H0BGE
3o/QHQjdidAHEPogQnch9CGEPozQRxC6G6GPIvQxhD6O0D0IfQKhexH6fYSOInQf
Qn+A0P0IPYDQJxH6FEJ/iNCnEfoMQg8i9BBCn0XoYYQ+h9DnETqG0B8h9AWEvojQ
lxD6MkKPIPQVhL6K0B8j9ChCX0Po6wj9CULfQOhPEZpB6JsI/RlC30LozxH6C4S+
jdB3EHoMob9E6HGE/gqhJxD6LkJ/jdD3EPo+Qn+D0JMIPYXQ0wgdR+hvEfoBQn+H
0N8j9A8I/RChf0TonxD6EUL/jNAzCP0LQs8i9GOE/hWhnyD0bwg9h9AJhH6K0M8Q
+neEnkfoBYR+jtCLCP0Cof9A6D8RegmhlxH6L4T+G6FfIvQrhF5B6H8QehWh/0Xo
/xB6DaGTAoW4s1+XYXGw2Xw8p1912FzdaVxVbK7m6NUwiVoWL2z+Ei+Yd9ppCecs
YS2V1fkeL1pSWcK5YnkqxTJXqj+V7uCvN1VrCcoWZvraJ0lMxzO7ECL278j3a2fb
+DRTk5f4PgEHP2s6Zt7PK9i6I8IhJqGEP9S1XQcfMOI/UuEP1/9wzSWO1rimvqOG
+vo9zquylPPzs9eMz7kA+vJUL4CulDIvpZgul/f0dm2al15uG72c89eru3tgzYLr
5ZqXXvOyQVJmg63x20Tzmb4/n+AQ6tikdcKpHVbhJaqjJM2+Hq1kFEKiJn4pjpvF
yPsWsfpjYZDHojl0RmG4DkZB78dBni5I2zdke658r4PbkqfbYBTcYkXAmAN2hMp2
QmBGARCjAIhRAMQoAGIUADEKgBgFQIwCIEYBEKMAiFEAxCgAYhQAMQqAGAVAjAIg
RgEQowCIUQDEKABiFAAxCoAYBUCMAiBGARCjAIhRAMQoAGIUADEKgBgFQIwCIEYB
EKMAiFEAxCgAYhQAMQqAGAVAjAIgRgEQowCIUQDEKABiFAAxCoAYBUCMAiBGARCj
AIhRAMQoAGIUADEKgBgFQIwCIEYBEKMAiFEAxCgAYhQAMQqAGAVAjAIgRgEQowCI
UQDEKABiFAAxCoAYBUCMAiBGARCjAIhRAMQoAGIUADEKgBgFQIwCIEYBEKMAiFEA
xCgAYhQAMQqAGAVAjAIgRgEQowCIUQDEKABiFAAxCoAYBUCMAiBGARCjAIhRAMQo
AGIUADEKgBgFQIwCIEYBEKMAiFEAxCgAYhQAMQqAGAVAjAIgRgEQowCIUQDEKABi
FAAxCoAYBUCMAiBGARCjAIhRAMQoAGIUADEKgBgFQIwCIEYBEKMAiFEAxCgAYhQA
MQqAGAVAjAIgRgEQowCIUQDEKABiFAAxCoAYBUCMAiBGARCjAIhRAMQoAGIUADEK
gBgFQIwC1GYUDrE1t37VI2Yu8UPmnCRs8A3eqlcVMWuyv+ok2gZw+6tsaRKwuaqt
p9xlzlb2vZuYf95gXdPrcZeJw1hPPWmcZieu1aiE0XJf7lZu4mOjLNzOYjiPjpTH
2ccDd4/q8aNOLf5mvrCP8zCb8s+4chX5syo/5o4aaXd6zLRRr5n2F94cD8eZPj61
Ip+7eP4zoy+R8bK14bIFcpgu448U9jgaT+xKJ9XBTCJ98Kbk5Pj+bIexYBxM565P
bMtO5yeSbO14dSKf4r/Qoaqj7GfnEhMaMLegqiraoqqtOov8BnUmoZeShdTkdCK9
ZXpqVzLP7juVKhRSmT3qvkR6Olk4vmQ1N9f0bsua/lgFrzRitHOL+AyTlcL0VXIG
6aY4TrvEZtLKz72ZLk5203MFeu4QPXdE/DXN3fR+j/ApVdjS8i2iW7WI80yflUIn
N78DoffQBopuEccrbDUkBgFmz62ii75ZLJGCotuGRbyC+A6LSXqruOcRka5NTC/P
tvBjnipDgdsyADU4FPBVHpmp6OY9rHsSwrsho+9mHKWKODfzZjlqDBczrqMjxtDh
NsPEUzmMsOLFw8SI84zHjF/ymmHVZ4ZnfPb5zCwnI6/nUPBb9PNKY7vJVfnJVCaR
PxiNRHtXMysuZouJNLVh0YfWRfq7e7sjXf19A5GB7t5t2/pjkf6+7oFId18sNhCJ
DvT2RdbFeo6/Ptnad6Ira3Qij/j0UfPTSLLlZAW5gKZfS4+oMKRemrKPhoEeg/QY
FuevoOcrO5FHGKRHGKVTGLf+J2vL6bFCXL9AnGOdaK0IszRREQ7wu2v5sU7UJ86H
xJPdLe49KMIt4kHjFrZwhUirdyJvlU7kqdGJWsVhdKJHjdPzEZZZhIeeGdE74zO0
M+rhow4zvFOZse9EHq0TsWoqhUuX62HSYoZLItzGOxfrLJvLOkvrvDvJ+WJsHNNG
c2rG3T3r6GdfNEo/o/1dQ8Ndsa7+ruN1x7Q3ZbXClOM19ffSfx5qIB46amum/us0
5UqachU9zqHHudyEc2KK5jbSmX9ZqX+HLSatPwMCPEfTPFeKmg2JgdMh0p0jwsw8
zy0zSV8Vk/SeHpN8i+ZdGjXMx2uaD7WWEcOUXMTWJKmO5pitWJ4JTsszwfKsOErD
r4dJsq61xjQ0tTA9NUVH2DWZwpo1V27riUYGevj42TsQ6Y3FYpF1/cfnkMbeTNc0
aKat9J+Dll2hY6NGrK+g32fRPNnURqXHanpUmmmrMMNWywqlzWI2y0U4IEZc3UzP
soyiKy2jqGoZRVeLsG6m/ipm6qthpi3iMMz0c5aZ2/zMlK84iLZqOIvvSIsbpjnj
1EyQnY+74iN2aeMOLe0N/ORhI3zYEm5TDtNVxkiZabbMyyyvoZ/b2JHak0ntTk0k
MsUNO5KFLVn6MaxeODScuVgdGp68iIa7Llb7uy5SL1W7I73RXnoiZp6gz31rjF42
BTj+emZub+jbKgwdatZQiP5zUnNVaE04haGHqNktIzF6bKTHI2RSGJPbSKMZue5i
8gqD141umTivG3lIGLkqrjEcE2Fm5BtFWDfsQBXD9p96w17I6UScezRUYynd5jDD
x2h4oQ37IjFmiLFzjBqO9nAXIfqAF6Eomwc0FN3e+FY3aHzVJggBqn2AjoMBanw9
FkZGnwgExXdAGMIyEQ6L0TPAjam6s1mZh7O5xi11pU+96Vgf3dWWZAvnqqzubP6+
OPaImBP0uE70cOnkXZrOZqu0cyewo+Y53dkctHU2B4U7kVieJdLZLJ3N0tksnc3S
2SydzdLZLJ3Np8vZHKrpbA7XdDa31HQ2t9Z0NrdVdTYHy+ZUilgJn2njbA5KZ7N0
Ni99Z3NQOpttnc2hKkNBmw0pVudQIJ3NzepsDkpns62zOVylEy2r0Ymks/m0OpuD
Te5sbqlikstPj0lKZ/PcnM3BJnc2t1Yx0zNqmKl0NjehsznYZM7mtiqGveLUG7Z0
Ns/mbA4uKWfz8upvR7uEluZOl0n3KNK9bBxn8Ol/wt0VSIWebdEb/ADp4i4zXkO8
5hQ6Vjj4Pyrn38sbT/+LEJbmVp+upeacVGxqgV1bgX6s4izL7wBbfzTC+gMR1veA
6+HK3wGu9Qbx2X4IwznLddcs1+/k45fLpu3PNM7+GoGKqzvi1bHPa61NBy1rozkc
E+2mvevDRcf4ueWg/TCIh7a2j3ySj/TKLBa/kLEeLpW/s6O+Vyda5dN13am+fAMN
5ctiPxzHZXCQubxicvZ71Z9vsKF8gzZlUMhcXno5+73qzzfUUL6hsjI4msCWHE1g
S44msCWlCWxJaQJbUpasLa0u3WRzbUd81XdupP8/u6FkzAe0Umv1H+UrJ03Oj1dq
rFS0lTYBNkpgzF/281J18A1HK6pocqvI793i+7D4Xi20d1SdV2ja/3aZ9jG+XfHU
aM+2TtXWXlnS2jsr0mzn8uUN5iyufssx55z1ak9qaL99+2zau2rOSI+5Gqv7hdV+
9rp3L2ntPQ1azkLb/fwsx7ugdb+w2s9e974lqv3ZpZCFsCGcrQhZZiDs+zc4HR6o
mHOcZzCAVoZeLZ3Lr7/J9ZD/8XBP2xWu7/k/FW5rY6xEJvRcC9su9UN+D8VCSWl5
tRG9aBrDeQBtPyqXW0Qp7J/l+h3tUqpxTUsfudz1jZb3hXra9rqebUmFWBr2zbSM
2mhZXhO6q2eN0KSdlN9uviVg2tQuAavn292eVlbPu2l8Vmr2rcyhBM4FLoGuTa0S
KOQj3p/6+gLP+b/mDfvPCHzL/5R3tf9V/0N+2gaOyhJUamixHePOK2gP0/tFJ09/
5GRUexc8jXUj76894vra0nJjvHZru025XMyfB+OpYjrZwbuWw+iWLQYZExGdzkUm
6QDM9tOzffNst/zaeD1V51Ltq47lwKqhdtVd6PtV64P+n7Rt9q1qu9X/zbZJX0/b
lP/BtoWtus0Orep6HGx3f2XVaVSihyiWqmMPo2tt6y50SuqO1UPtutvqfCy4wTUa
3ud8PrjStTp8xOkKuVzh8ELU3S1Ove7uf02rux+9Zm92SpW623Ea647VQ+26ezz8
xeBXWqbCPw//IPjBltGwp+XF4M0tMVp3Xc751t17A3rdPUq0umM+eru6c/K686K6
Y4+xHbHTWHmsIuwr7+x4ibs1Djvezr0UazamExN71URmUr3m+lQxSe7hGTKzfQdR
PSZNbZddPbSE9WF69OgDpFQqkaeffprs3LmTY/Z94sQJHl5KcZpRZPtIkSKlEXm+
pDtMXyBxp7lcZE/Jk7J6pEhpSF4gbS7sUjzZhE9nGUfGkXHqj2M+WxXLs1XWlIwj
48ylFzllL5JxZJx59iKXXOdJkTLHdZ7ei9yyF0mRMs9e5JG9SIqUefYir+xFUqTM
SZ6Pl+LvNHYtmX9Jer/xc1Qao/+A8dYxy+YgvovRj67qL4LXr/J3AsT7jb9KZfsd
x/LZG5ITRTWV2Z01/jrVKvrWi1pbNRZuHyiWxfjXqdqmHb0uzF36a+NTfD8O09vY
BRy/4rEfO590ZLgemw7kkvnUVDJTZK+aTpIs38uzLZnriMY6uqKxdSTDt+RZ4o0O
0Vi83jI88pZsMbkrm92LLvjMZjRPhlFGybx5xa9FL2YnsmnzLP8S6Hb+mhbRXGzb
9YbvPvHEeruGN220P+4sxRegDzji/w8AAP//AwCjpRqI
</Template></GraphPadPrismFile>
